# Supplementary material for: Silicone Oil Decreases Biofilm Formation in a Capacitance-Based Automatic Urine Measurement System
Source: MDPI journal article supplement (doi:10.3390/s21020445), 2021-01-10
Supplement: s1 [file s1]

**Table S2.** Capacitance parameters and change over 22 hours with free hemoglobin solution (0.01 g/L).

| With silicone oil (n=414) |            |            |            |                    |     | Without silicone oil (n=484) |            |            |                    |     |                                 |
|---------------------------|------------|------------|------------|--------------------|-----|------------------------------|------------|------------|--------------------|-----|---------------------------------|
| Hou<br>r                  | Min<br>cap | Max<br>cap | Medi<br>an | Mean<br>min<br>cap | SD  | Mi<br>n<br>cap               | Max<br>cap | Medi<br>an | Mean<br>min<br>cap | SD  | P-value<br>(mean<br>min<br>cap) |
| 1                         | 379        | 414        | 396        | 396                | 11  | 378                          | 411        | 393        | 393                | 10  | 0.09                            |
| 2                         | 406        | 641        | 449        | 449                | 49  | 404                          | 496        | 451        | 451                | 26  | 0.266                           |
| 3                         | 398        | 650        | 462        | 462                | 51  | 416                          | 563        | 470        | 470                | 33  | 0.272                           |
| 4                         | 427        | 530        | 467        | 467                | 22  | 417                          | 534        | 472        | 472                | 31  | 0.542                           |
| 5                         | 432        | 539        | 479        | 479                | 24  | 417                          | 561        | 476        | 476                | 35  | 0.649                           |
| 6                         | 432        | 561        | 490        | 490                | 27  | 408                          | 691        | 490        | 490                | 58  | 0.642                           |
| 7                         | 433        | 575        | 499        | 499                | 30  | 414                          | 773        | 511        | 511                | 89  | 0.652                           |
| 8                         | 434        | 591        | 505        | 505                | 31  | 414                          | 798        | 507        | 507                | 87  | 0.327                           |
| 9                         | 435        | 601        | 505        | 505                | 32  | 411                          | 843        | 540        | 540                | 125 | 0.724                           |
| 10                        | 430        | 752        | 522        | 522                | 66  | 415                          | 881        | 579        | 579                | 158 | 0.622                           |
| 11                        | 429        | 779        | 523        | 523                | 74  | 404                          | 880        | 596        | 596                | 175 | 0.922                           |
| 12                        | 431        | 765        | 522        | 522                | 73  | 404                          | 874        | 612        | 612                | 177 | 0.518                           |
| 13                        | 433        | 767        | 520        | 520                | 74  | 410                          | 873        | 638        | 638                | 177 | 0.257                           |
| 14                        | 431        | 761        | 516        | 516                | 73  | 403                          | 862        | 646        | 646                | 179 | 0.232                           |
| 15                        | 438        | 783        | 518        | 518                | 79  | 399                          | 866        | 666        | 666                | 178 | 0.164                           |
| 16                        | 451        | 777        | 521        | 521                | 79  | 422                          | 873        | 676        | 676                | 179 | 0.176                           |
| 17                        | 456        | 767        | 516        | 516                | 81  | 421                          | 877        | 686        | 686                | 183 | 0.091                           |
| 18                        | 454        | 776        | 516        | 516                | 83  | 402                          | 880        | 700        | 700                | 179 | 0.058                           |
| 19                        | 448        | 784        | 522        | 522                | 83  | 406                          | 873        | 703        | 703                | 181 | 0.06                            |
| 20                        | 433        | 775        | 528        | 528                | 93  | 420                          | 878        | 707        | 707                | 183 | 0.031                           |
| 21                        | 428        | 818        | 557        | 557                | 113 | 409                          | 897        | 711        | 711                | 186 | 0.037                           |
| 22                        | 428        | 824        | 564        | 564                | 117 | 412                          | 907        | 716        | 716                | 189 | 0.028                           |
