# Supplementary material for: Silicone Oil Decreases Biofilm Formation in a Capacitance-Based Automatic Urine Measurement System
Source: MDPI journal article supplement (doi:10.3390/s21020445), 2021-01-10
Supplement: s1 [file s1]

**Table S1.** Capacitance parameters and change over 23 hours with albumin solution (3 g/L).

|                  | With silicone oil (n=472) |            |            |                    |    | Without silicone oil (n=477) |            |            |                    |    |                              |
|------------------|---------------------------|------------|------------|--------------------|----|------------------------------|------------|------------|--------------------|----|------------------------------|
| <b>Hou<br/>r</b> | Min<br>cap                | Max<br>cap | Medi<br>an | Mean<br>min<br>cap | SD | Mi<br>n<br>cap               | Max<br>cap | Medi<br>an | Mean<br>min<br>cap | SD | P-value<br>(mean<br>min cap) |
| 1                | 381                       | 433        | 405        | 406                | 12 | 382                          | 415        | 406        | 401                | 10 | 0.176                        |
| 2                | 413                       | 458        | 433        | 433                | 11 | 406                          | 464        | 438        | 434                | 17 | 0.56                         |
| 3                | 417                       | 471        | 439        | 439                | 15 | 407                          | 482        | 437        | 441                | 18 | 0.839                        |
| 4                | 417                       | 479        | 447        | 444                | 17 | 418                          | 488        | 443        | 449                | 19 | 0.756                        |
| 5                | 406                       | 510        | 454        | 451                | 21 | 426                          | 506        | 446        | 456                | 26 | 0.914                        |
| 6                | 422                       | 497        | 452        | 453                | 19 | 416                          | 554        | 450        | 459                | 36 | 0.903                        |
| 7                | 426                       | 506        | 457        | 457                | 19 | 420                          | 566        | 457        | 468                | 39 | 0.675                        |
| 8                | 426                       | 508        | 455        | 458                | 19 | 418                          | 583        | 460        | 477                | 45 | 0.386                        |
| 9                | 423                       | 499        | 454        | 457                | 17 | 423                          | 590        | 479        | 488                | 48 | 0.062                        |
| 10               | 425                       | 500        | 458        | 458                | 18 | 419                          | 614        | 485        | 496                | 51 | 0.011                        |
| 11               | 419                       | 507        | 460        | 461                | 19 | 436                          | 614        | 503        | 511                | 52 | <0.001                       |
| 12               | 425                       | 508        | 461        | 462                | 19 | 437                          | 627        | 522        | 523                | 57 | <0.001                       |
| 13               | 428                       | 505        | 473        | 468                | 20 | 454                          | 649        | 524        | 534                | 58 | <0.001                       |
| 14               | 436                       | 487        | 469        | 467                | 15 | 467                          | 670        | 524        | 541                | 66 | <0.001                       |
| 15               | 441                       | 500        | 480        | 476                | 17 | 456                          | 716        | 560        | 561                | 71 | <0.001                       |
| 16               | 430                       | 503        | 478        | 476                | 19 | 447                          | 727        | 545        | 567                | 76 | <0.001                       |
| 17               | 440                       | 513        | 485        | 481                | 19 | 454                          | 760        | 572        | 585                | 81 | <0.001                       |
| 18               | 441                       | 520        | 488        | 483                | 22 | 452                          | 754        | 596        | 600                | 79 | <0.001                       |
| 19               | 440                       | 544        | 490        | 493                | 24 | 452                          | 759        | 645        | 615                | 81 | <0.001                       |
| 20               | 437                       | 535        | 497        | 496                | 24 | 479                          | 729        | 659        | 639                | 65 | <0.001                       |
| 21               | 439                       | 554        | 502        | 504                | 32 | 470                          | 788        | 659        | 652                | 71 | <0.001                       |
| 22               | 440                       | 556        | 502        | 501                | 27 | 494                          | 790        | 670        | 665                | 63 | <0.001                       |
| 23               | 400                       | 660        | 503        | 503                | 56 | 472                          | 785        | 677        | 674                | 67 | <0.001                       |
